# Supplementary material for: Systemic Sclerosis Immunoglobulin Induces Growth and a Pro-Fibrotic State in Vascular Smooth Muscle Cells through the Epidermal Growth Factor Receptor
Source: PubMed Central journal article supplement (PMC4057313; doi:10.1371/journal.pone.0100035), 2014-06-13

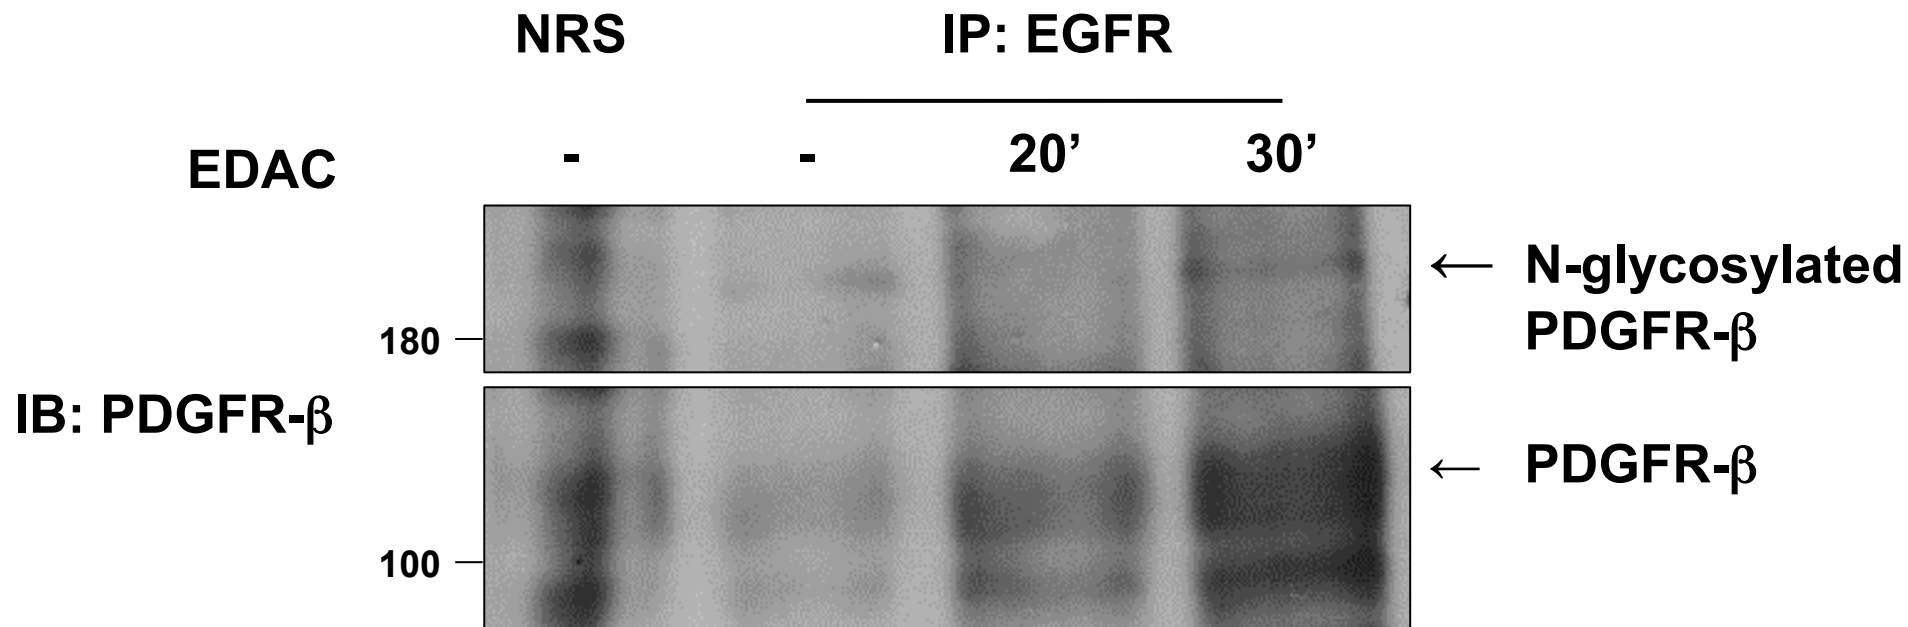

Supplement: pone.0100035.s004.pdf [file pone.0100035.s004.pdf]
