# Supplementary material for: Systemic Sclerosis Immunoglobulin Induces Growth and a Pro-Fibrotic State in Vascular Smooth Muscle Cells through the Epidermal Growth Factor Receptor
Source: PubMed Central journal article supplement (PMC4057313; doi:10.1371/journal.pone.0100035), 2014-06-13
Supplement: pone.0100035.s005.pdf [file pone.0100035.s005.pdf]

| Sample | Sex | Age | ANA               | PH   | Active<br>vascular<br>ulcers | Peripheral<br>vascular<br>DSS | mRSS | Past use of<br>immuno-<br>suppressives | Stimu-<br>lation<br>Index <sup>8</sup> |
|--------|-----|-----|-------------------|------|------------------------------|-------------------------------|------|----------------------------------------|----------------------------------------|
| 1      | F   | 24  | T <sup>1</sup>    | n.a. | +                            | 3                             | 22   | CS: recent <sup>6</sup>                | 71                                     |
| 2      | F   | 69  | R <sup>2</sup>    | +    | +                            | 4                             | 43   | None                                   | 79                                     |
| 3      | F   | 45  | R                 | -    | +                            | 2                             | 29   | MTX, HCQ:<br>not recent <sup>7</sup>   | 69                                     |
| 4      | F   | 43  | T                 | -    | -                            | 3                             | 6    | None                                   | 35                                     |
| 5      | F   | 60  | R                 | -    | -                            | 1                             | 18   | None                                   | 69                                     |
| 6      | F   | 46  | T                 | -    | +                            | 3                             | 4    | None                                   | 0                                      |
| 7      | F   | .   | O <sup>3</sup>    | -    | -                            | 0                             | 11   | None                                   | 22                                     |
| 8      | F   | 59  | n.a. <sup>4</sup> | -    | -                            | 0                             | 29   | None                                   | 27                                     |
| 9      | F   | 69  | C <sup>5</sup>    | -    | -                            | 0                             | 17   | None                                   | 49                                     |
| 10     | F   | 25  | n.a.              | -    | -                            | 3                             | 30   | None                                   | 47                                     |
| 11     | F   | 52  | C                 | -    | -                            | 0                             | 2    | None                                   | 0                                      |
| 12     | F   | 50  | R                 | -    | -                            | 3                             | 4    | None                                   | 52                                     |

|    |   |    |   |      |      |      |      |                |     |
|----|---|----|---|------|------|------|------|----------------|-----|
| 13 | F | 60 | R | -    | -    | 1    | 18   | CS: not recent | 82  |
| 14 | F | 75 | C | -    | -    | 1    | 14   | None           | 15  |
| 15 | F | 32 | T | -    | +    | n.a. | n.a. | None           | 16  |
| 16 | F | 38 | O | -    | +    | n.a. | n.a. | None           | 29  |
| 17 | F | 33 | R | -    | -    | n.a. | n.a. | None           | 10  |
| 18 | F | 30 | T | -    | -    | n.a. | n.a. | None           | 100 |
| 19 | F | 65 | C | -    | -    | 2    | 13   | None           | 186 |
| 20 | M | 53 | T | -    | +    | 3    | 14   | MTX: recent    | 157 |
| 21 | M | 39 | R | -    | +    | 3    | n.a. | None           | 58  |
| 22 | F | 60 | R | -    | n.a. | n.a. | n.a. | None           | 101 |
| 23 | F | 42 | R | n.a. | -    | 2    | 30   | None           | 17  |

---
